# Supplementary material for: Simultaneous versus staged bilateral total hip arthroplasty: a systematic review and meta-analysis
Source: Springer Nature journal article supplement (doi:10.1186/s13018-022-03281-4), 2022-08-13
Supplement: MOESM3 [file 23364126]

# Simultaneous versus staged bilateral total hip arthroplasty; a systematic review and meta-analysis

*Journal of Orthopaedic Surgery and Research*

Supplementary Materials

## Funnel plot and Egger's regression test for DVT

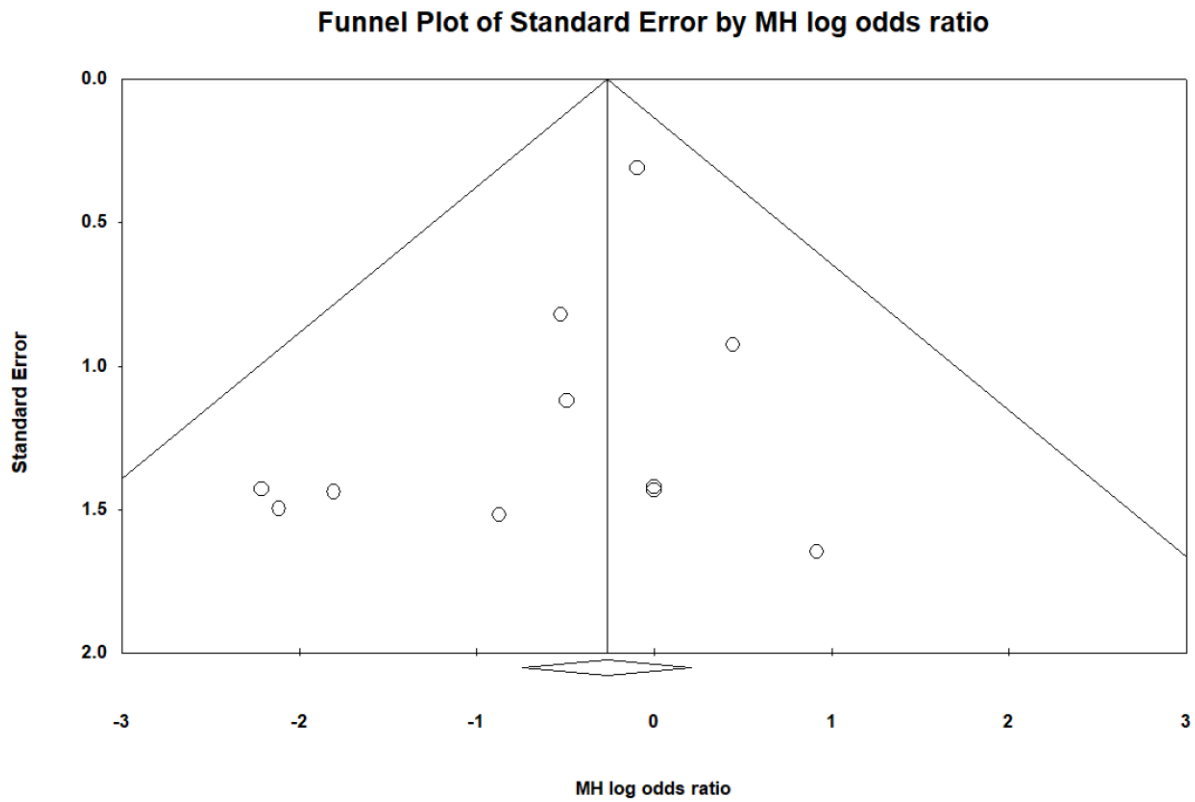

### Egger's regression intercept

|                            |          |
|----------------------------|----------|
| Intercept                  | -0.57818 |
| Standard error             | 0.38837  |
| 95% lower limit (2-tailed) | -1.45673 |
| 95% upper limit (2-tailed) | 0.30038  |
| t-value                    | 1.48872  |
| df                         | 9.00000  |
| P-value (1-tailed)         | 0.08537  |
| P-value (2-tailed)         | 0.17074  |

## Funnel plot and Egger's regression test for PE

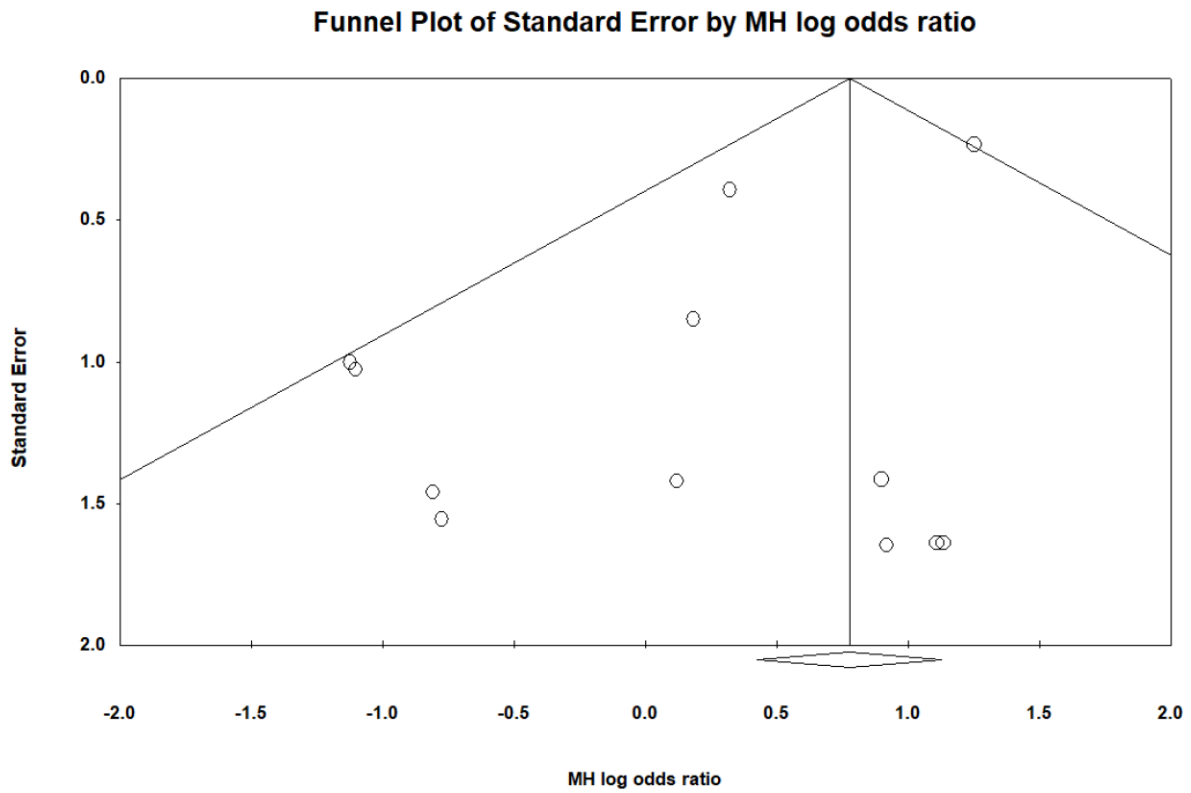

### Egger's regression intercept

|                            |          |
|----------------------------|----------|
| Intercept                  | -1.05056 |
| Standard error             | 0.42985  |
| 95% lower limit (2-tailed) | -2.00832 |
| 95% upper limit (2-tailed) | -0.09280 |
| t-value                    | 2.44404  |
| df                         | 10.00000 |
| P-value (1-tailed)         | 0.01730  |
| P-value (2-tailed)         | 0.03461  |

## Funnel plot and Egger's regression test for Pulmonary complications

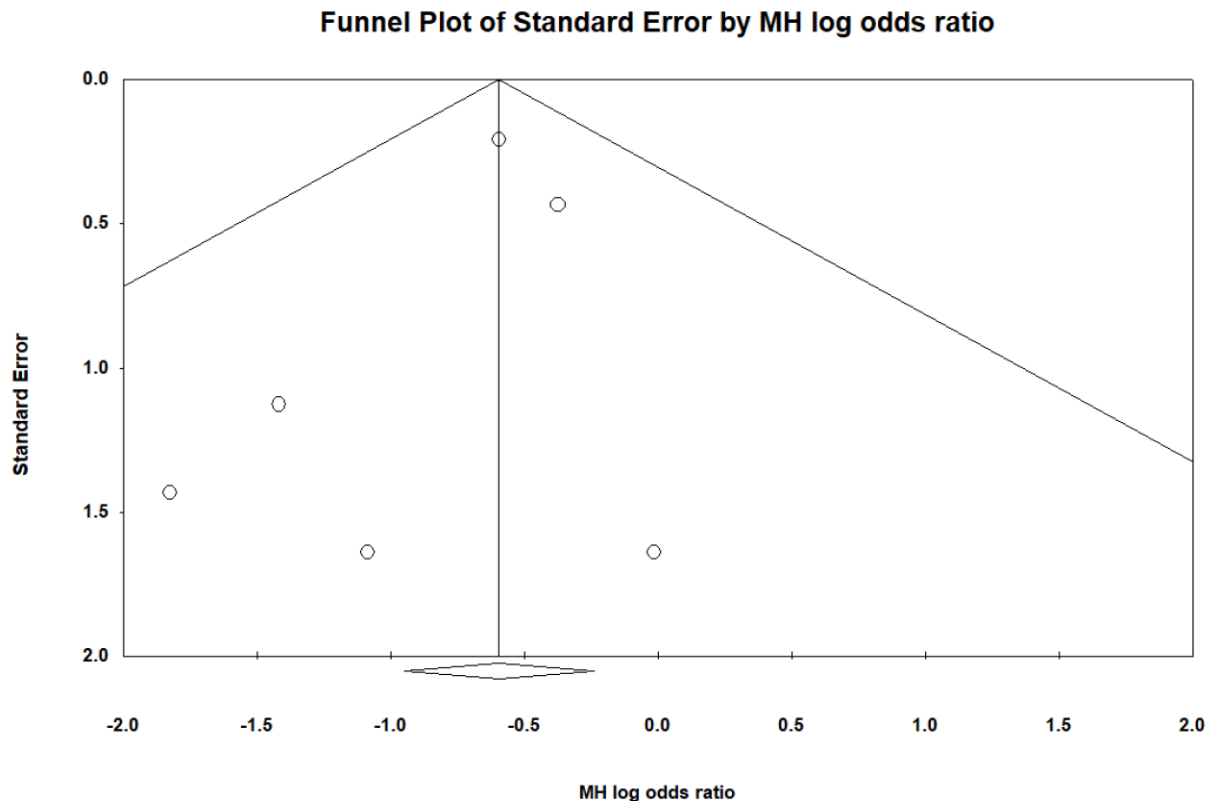

### Egger's regression intercept

|                            |          |
|----------------------------|----------|
| Intercept                  | -0.36626 |
| Standard error             | 0.35168  |
| 95% lower limit (2-tailed) | -1.34267 |
| 95% upper limit (2-tailed) | 0.61016  |
| t-value                    | 1.04146  |
| df                         | 4.00000  |
| P-value (1-tailed)         | 0.17823  |
| P-value (2-tailed)         | 0.35647  |

## Funnel plot and Egger's regression test for Systemic complications

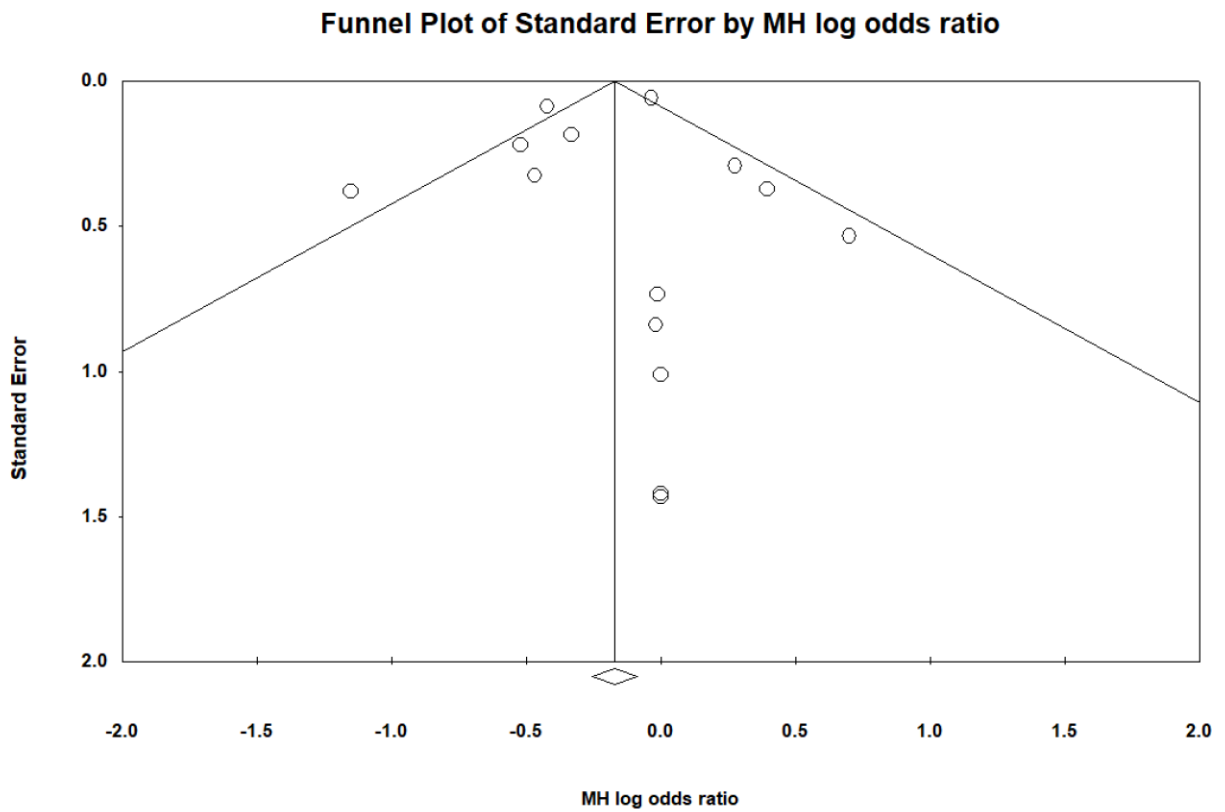

### Egger's regression intercept

|                            |          |
|----------------------------|----------|
| Intercept                  | -0.13225 |
| Standard error             | 0.58769  |
| 95% lower limit (2-tailed) | -1.41272 |
| 95% upper limit (2-tailed) | 1.14823  |
| t-value                    | 0.22502  |
| df                         | 12.00000 |
| P-value (1-tailed)         | 0.41287  |
| P-value (2-tailed)         | 0.82575  |

## Funnel plot and Egger's regression test for Local complications

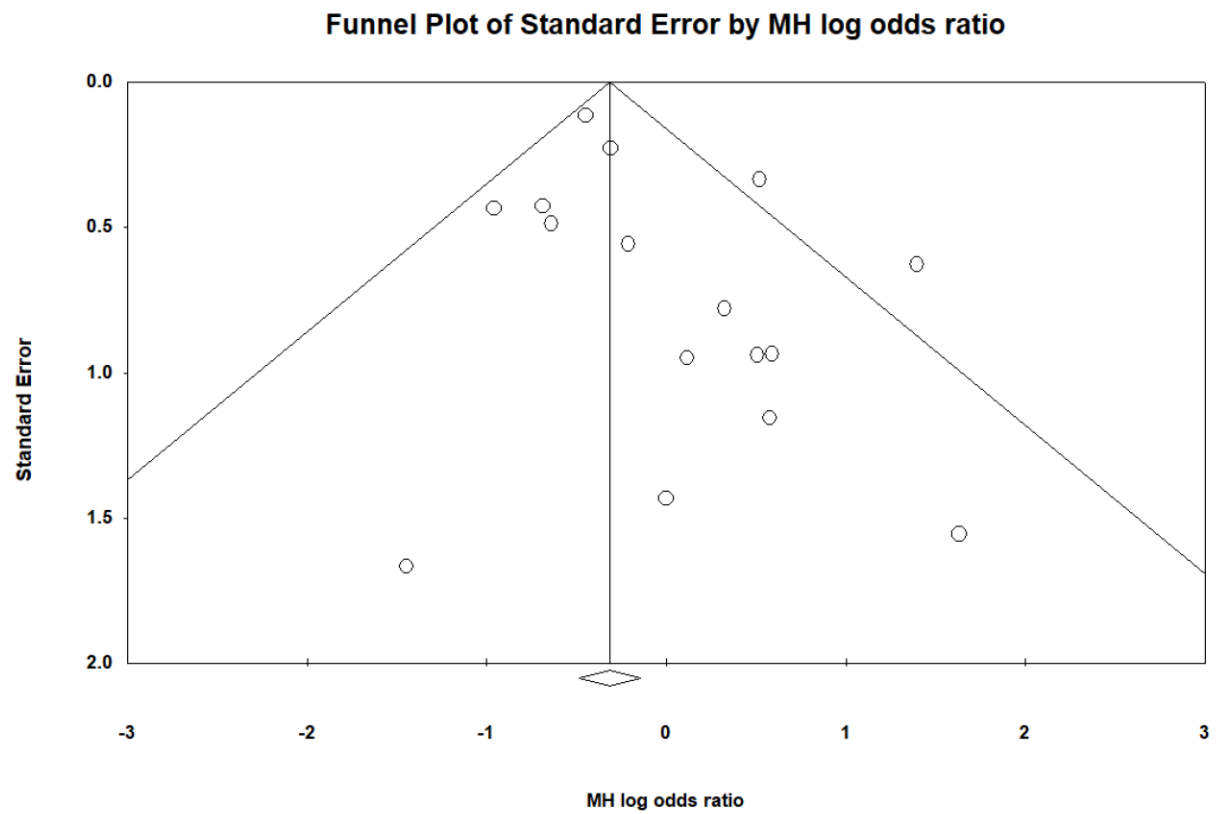

### Egger's regression intercept

|                            |          |
|----------------------------|----------|
| Intercept                  | 0.78805  |
| Standard error             | 0.42490  |
| 95% lower limit (2-tailed) | -0.12327 |
| 95% upper limit (2-tailed) | 1.69936  |
| t-value                    | 1.85467  |
| df                         | 14.00000 |
| P-value (1-tailed)         | 0.04241  |
| P-value (2-tailed)         | 0.08482  |

## Funnel plot and Egger's regression test for PJI

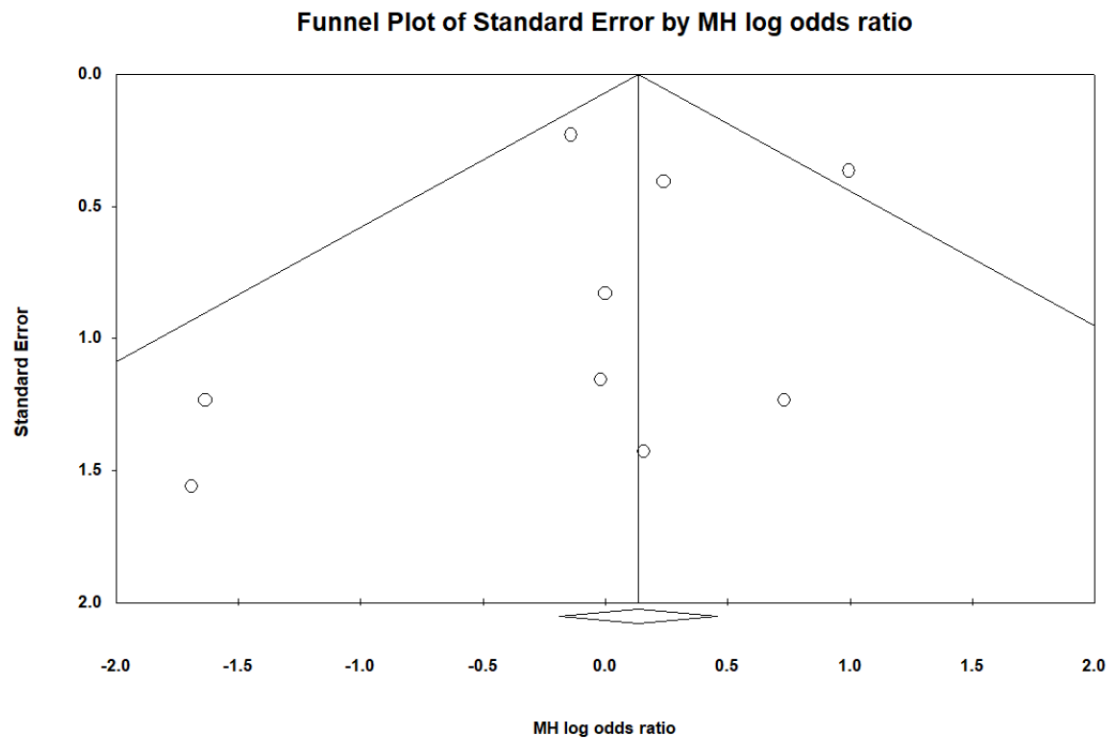

### Egger's regression intercept

|                            |          |
|----------------------------|----------|
| Intercept                  | -0.30833 |
| Standard error             | 0.67740  |
| 95% lower limit (2-tailed) | -1.91014 |
| 95% upper limit (2-tailed) | 1.29347  |
| t-value                    | 0.45517  |
| df                         | 7.00000  |
| P-value (1-tailed)         | 0.33138  |
| P-value (2-tailed)         | 0.66277  |

## Funnel plot and Egger's regression test for Fracture

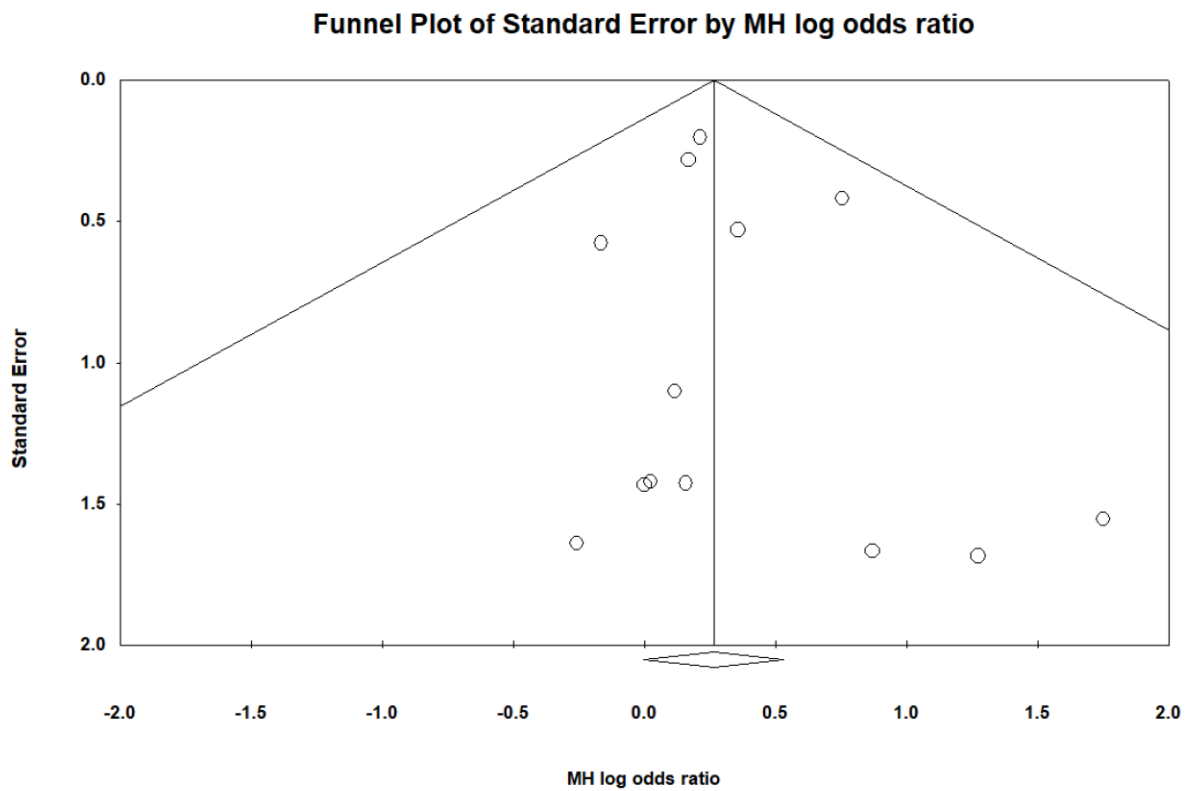

### Egger's regression intercept

|                            |          |
|----------------------------|----------|
| Intercept                  | 0.19336  |
| Standard error             | 0.24096  |
| 95% lower limit (2-tailed) | -0.33699 |
| 95% upper limit (2-tailed) | 0.72371  |
| t-value                    | 0.80246  |
| df                         | 11.00000 |
| P-value (1-tailed)         | 0.21964  |
| P-value (2-tailed)         | 0.43928  |

## Funnel plot and Egger's regression test for Dislocation

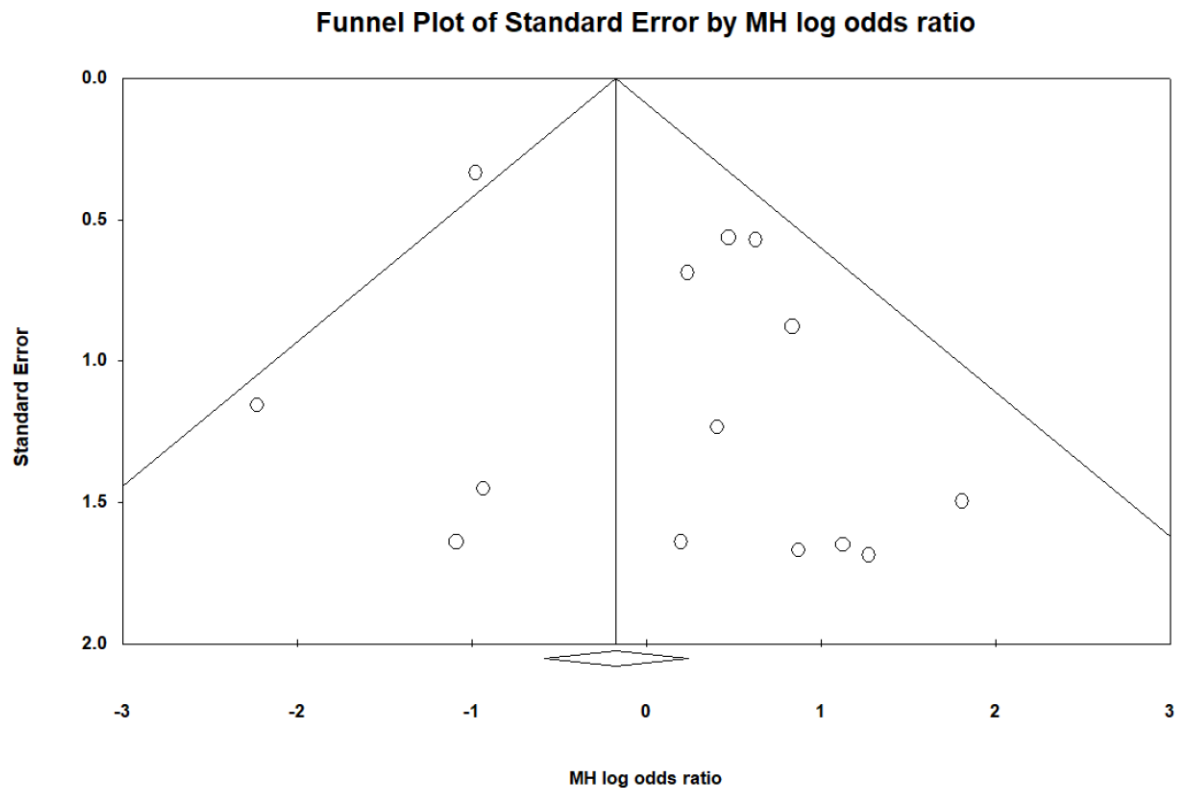

### Egger's regression intercept

|                            |          |
|----------------------------|----------|
| Intercept                  | 0.85617  |
| Standard error             | 0.57406  |
| 95% lower limit (2-tailed) | -0.39459 |
| 95% upper limit (2-tailed) | 2.10693  |
| t-value                    | 1.49144  |
| df                         | 12.00000 |
| P-value (1-tailed)         | 0.08083  |
| P-value (2-tailed)         | 0.16166  |



## Funnel plot and Egger's regression test for Mortality

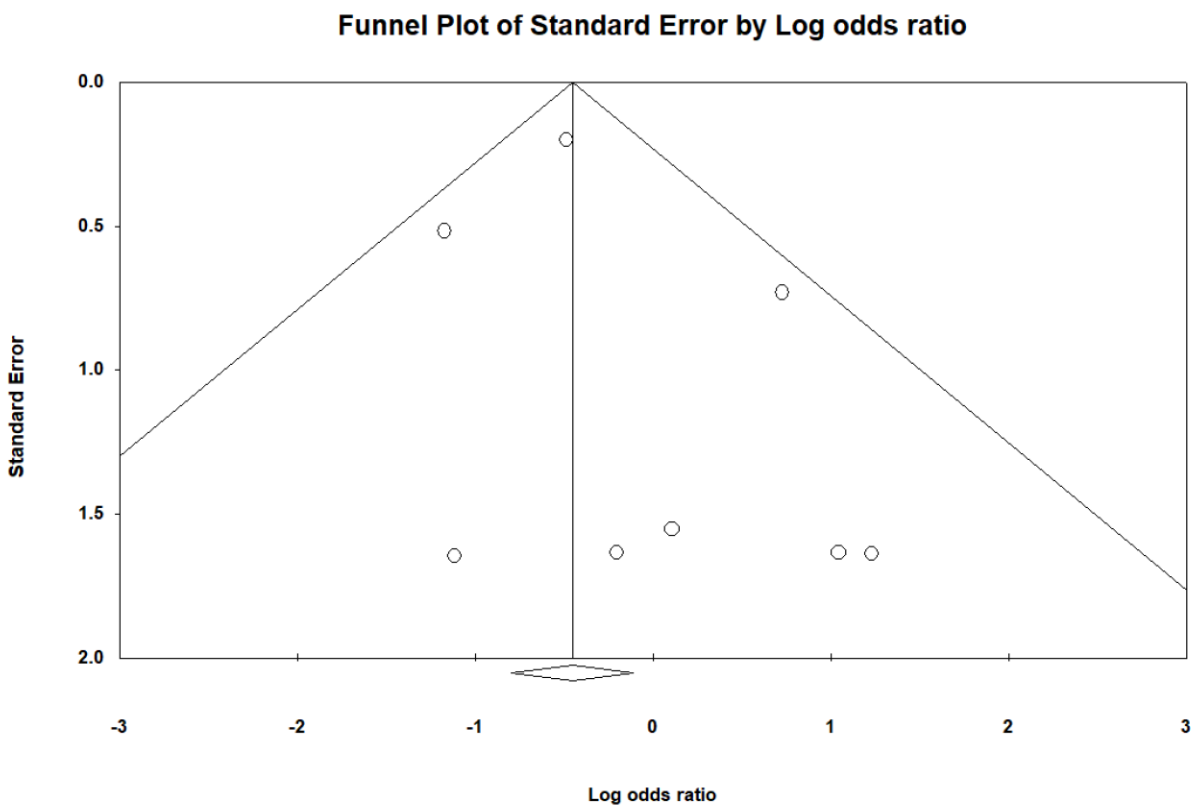

### Egger's regression intercept

|                            |          |
|----------------------------|----------|
| Intercept                  | 0.53165  |
| Standard error             | 0.48443  |
| 95% lower limit (2-tailed) | -0.65370 |
| 95% upper limit (2-tailed) | 1.71699  |
| t-value                    | 1.09747  |
| df                         | 6.00000  |
| P-value (1-tailed)         | 0.15726  |
| P-value (2-tailed)         | 0.31451  |

## Funnel plot and Egger's regression test for LOS

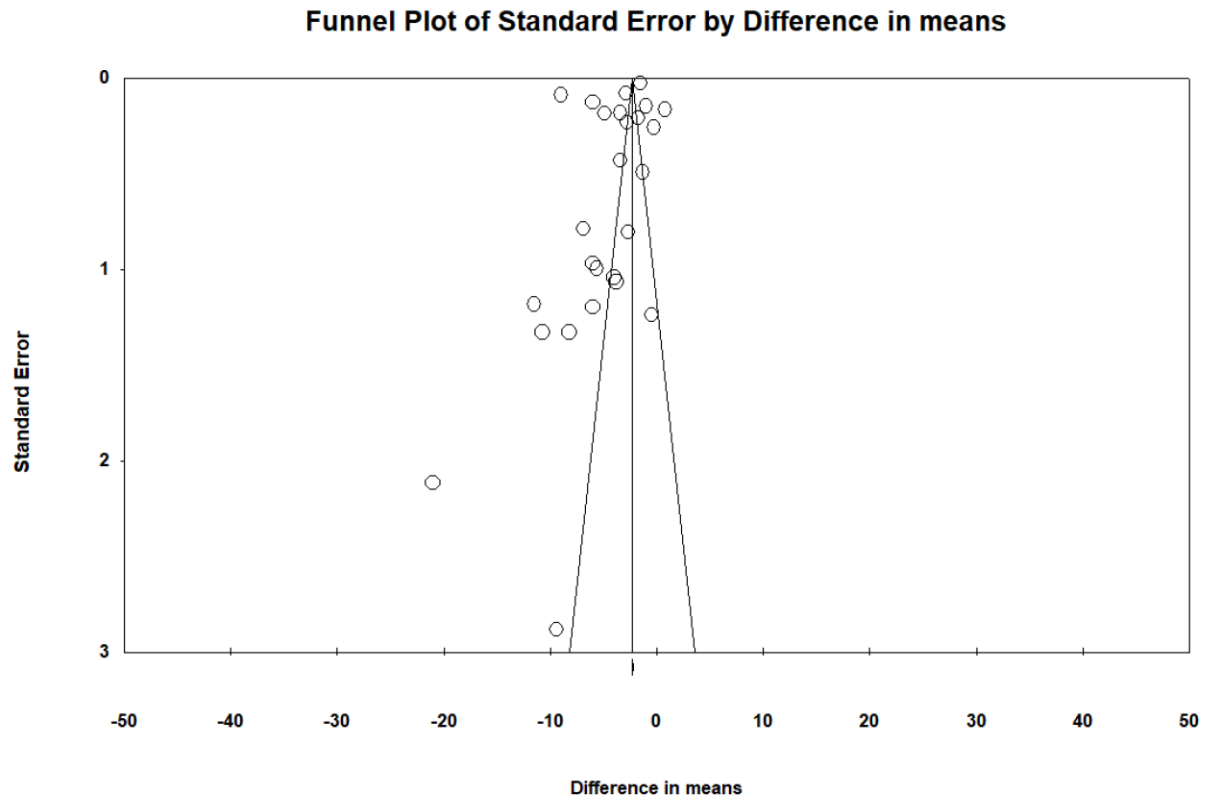

### Egger's regression intercept

|                            |           |
|----------------------------|-----------|
| Intercept                  | -6.42221  |
| Standard error             | 4.32634   |
| 95% lower limit (2-tailed) | -15.35133 |
| 95% upper limit (2-tailed) | 2.50691   |
| t-value                    | 1.48444   |
| df                         | 24.00000  |
| P-value (1-tailed)         | 0.07535   |
| P-value (2-tailed)         | 0.15071   |

## Funnel plot and Egger's regression test for Operation Time

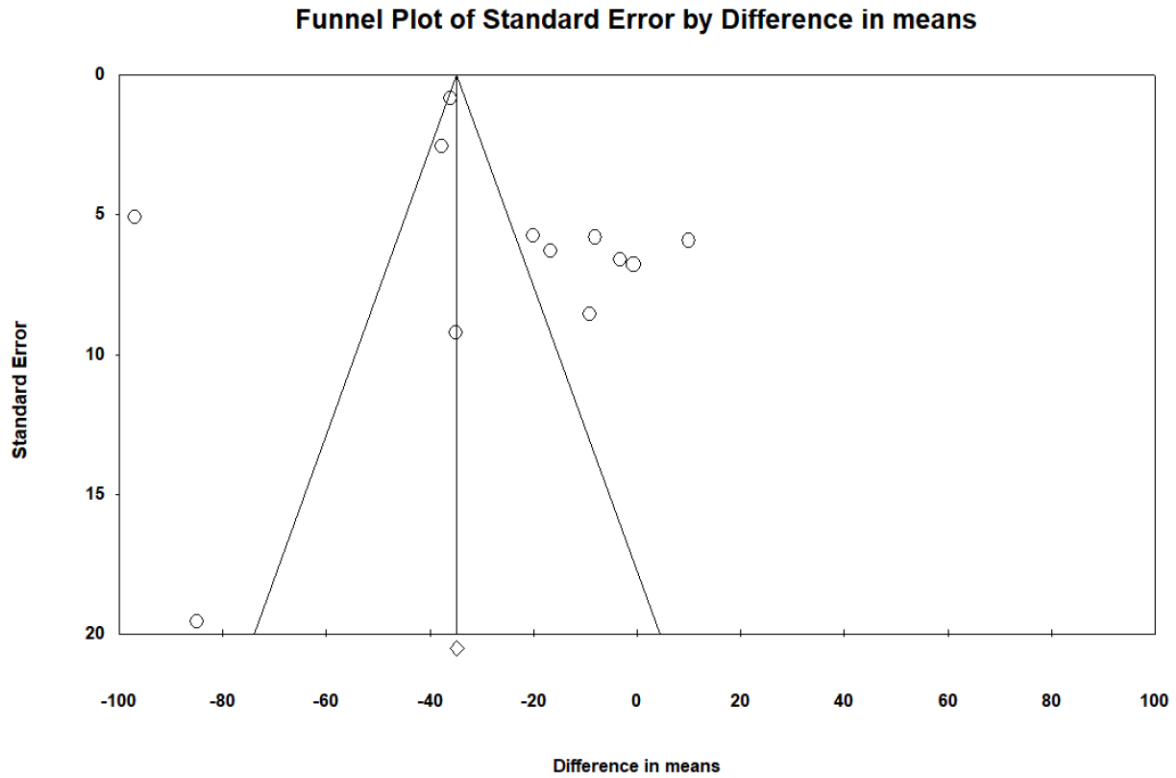

### Egger's regression intercept

|                            |          |
|----------------------------|----------|
| Intercept                  | 1.85934  |
| Standard error             | 2.02077  |
| 95% lower limit (2-tailed) | -2.64321 |
| 95% upper limit (2-tailed) | 6.36189  |
| t-value                    | 0.92012  |
| df                         | 10.00000 |
| P-value (1-tailed)         | 0.18959  |
| P-value (2-tailed)         | 0.37917  |

## Funnel plot and Egger's regression test for Total Blood Loss

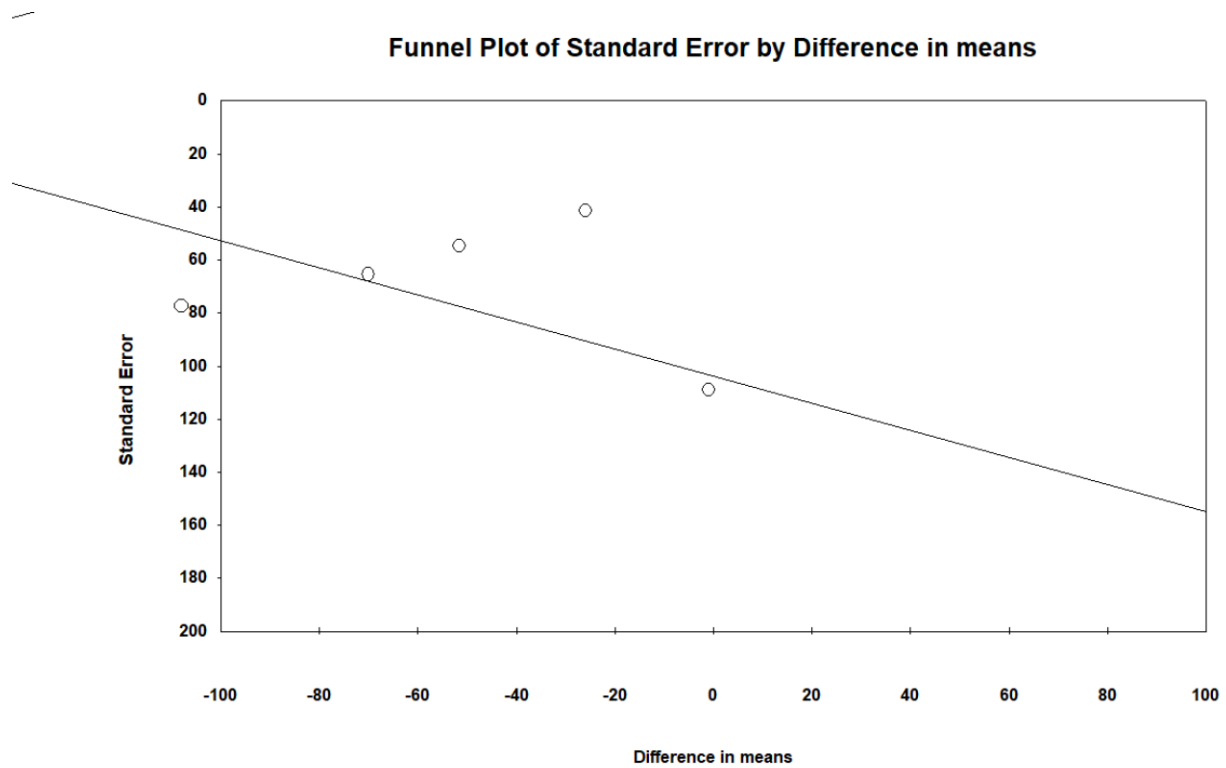

### Egger's regression intercept

|                            |          |
|----------------------------|----------|
| Intercept                  | -1.88343 |
| Standard error             | 2.24470  |
| 95% lower limit (2-tailed) | -6.88494 |
| 95% upper limit (2-tailed) | 3.11808  |
| t-value                    | 0.83905  |
| df                         | 10.00000 |
| P-value (1-tailed)         | 0.21052  |
| P-value (2-tailed)         | 0.42104  |

## Funnel plot and Egger's regression test for Blood Transfusion need

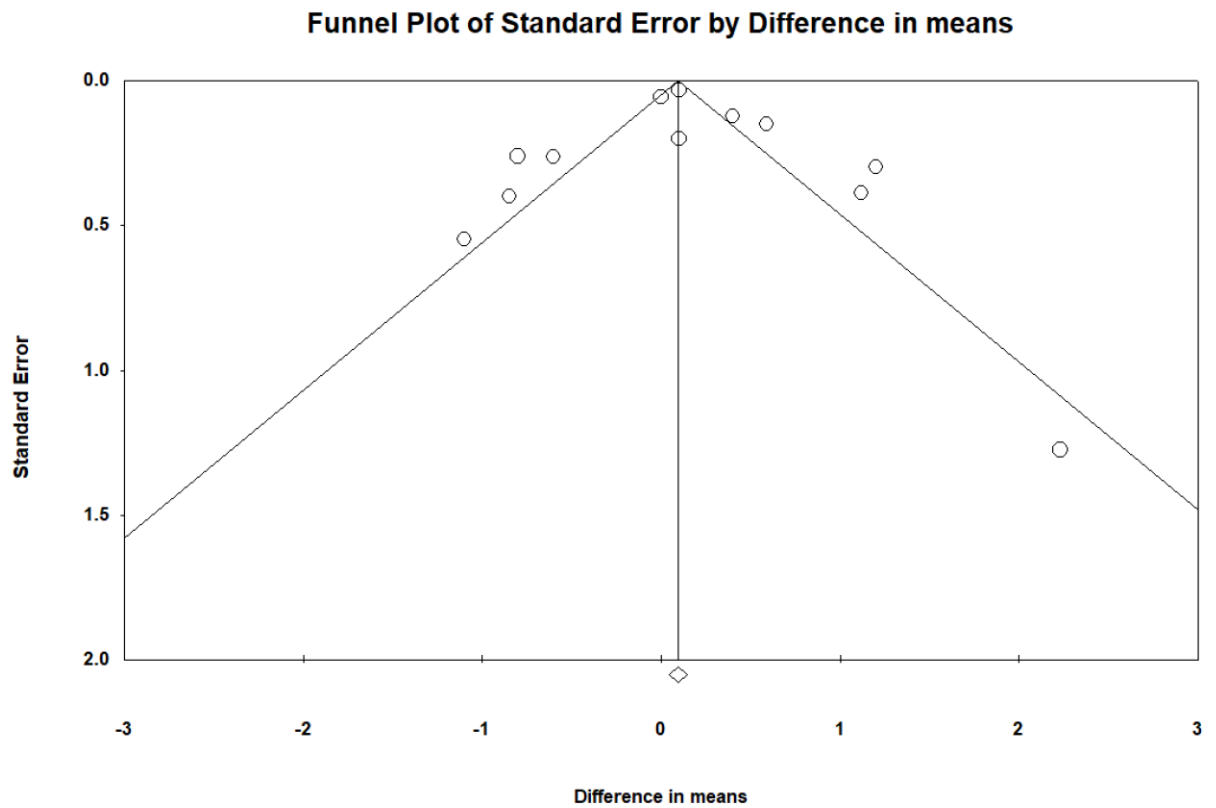

### Egger's regression intercept

|                            |          |
|----------------------------|----------|
| Intercept                  | 0.22640  |
| Standard error             | 1.03344  |
| 95% lower limit (2-tailed) | -2.07624 |
| 95% upper limit (2-tailed) | 2.52905  |
| t-value                    | 0.21908  |
| df                         | 10.00000 |
| P-value (1-tailed)         | 0.41550  |
| P-value (2-tailed)         | 0.83100  |

## Funnel plot and Egger's regression test for Revision

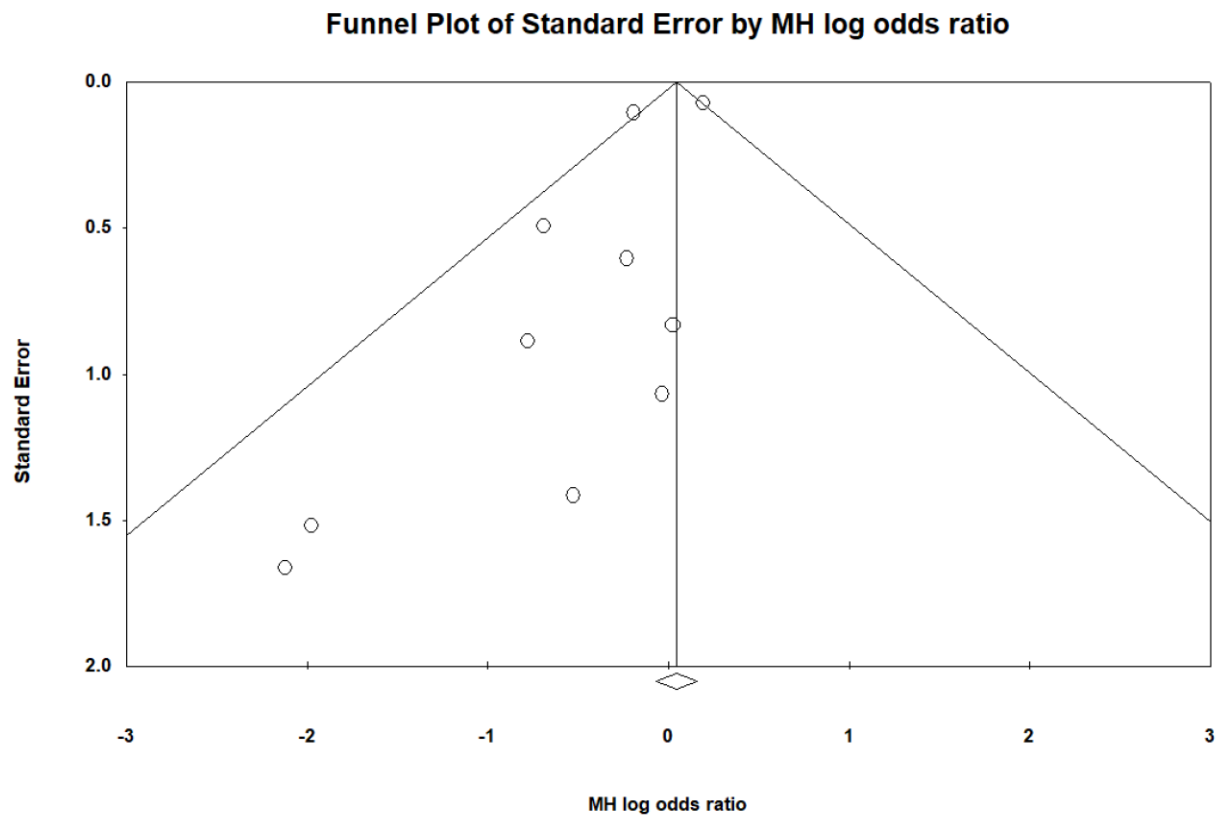

### Egger's regression intercept

|                            |          |
|----------------------------|----------|
| Intercept                  | -0.95695 |
| Standard error             | 0.44716  |
| 95% lower limit (2-tailed) | -1.98811 |
| 95% upper limit (2-tailed) | 0.07422  |
| t-value                    | 2.14003  |
| df                         | 8.00000  |
| P-value (1-tailed)         | 0.03239  |
| P-value (2-tailed)         | 0.06477  |

## Funnel plot and Egger's regression test for Readmission

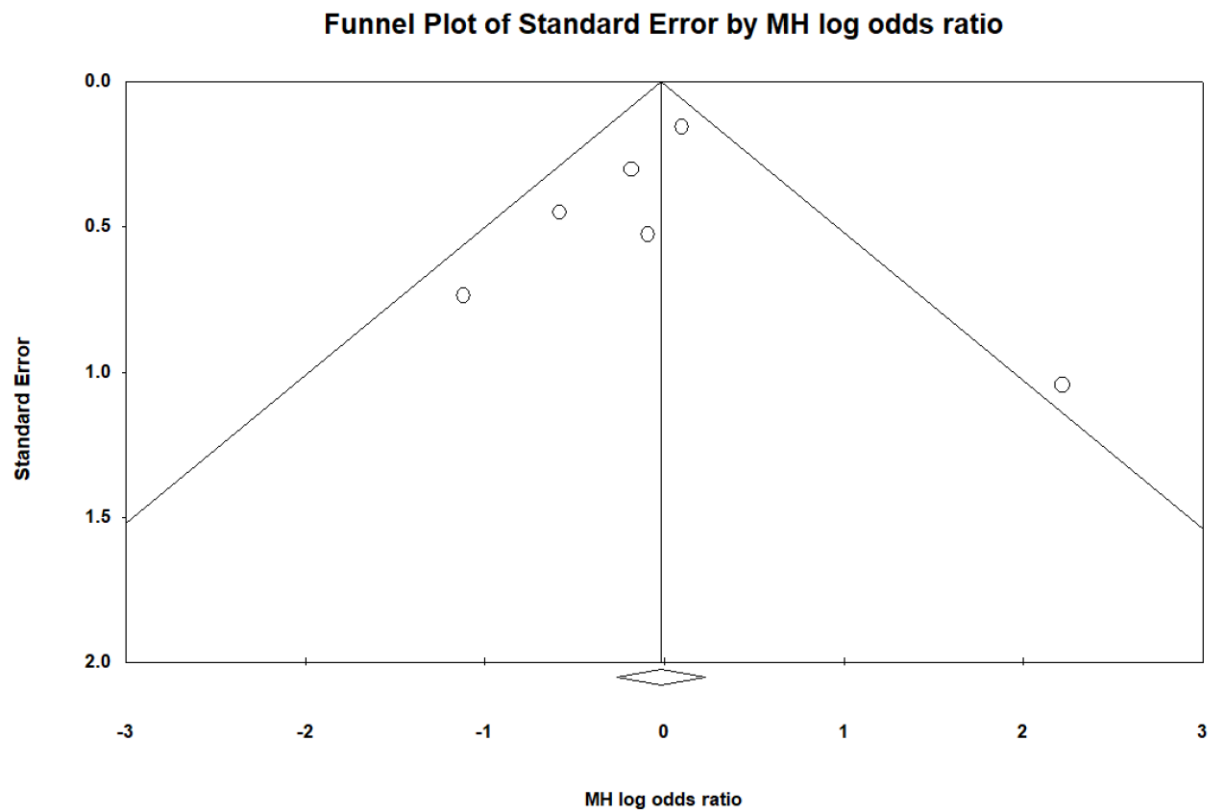

### Egger's regression intercept

|                            |          |
|----------------------------|----------|
| Intercept                  | -0.28687 |
| Standard error             | 1.09398  |
| 95% lower limit (2-tailed) | -3.32424 |
| 95% upper limit (2-tailed) | 2.75050  |
| t-value                    | 0.26222  |
| df                         | 4.00000  |
| P-value (1-tailed)         | 0.40305  |
| P-value (2-tailed)         | 0.80610  |

## Funnel plot and Egger's regression test for HHS

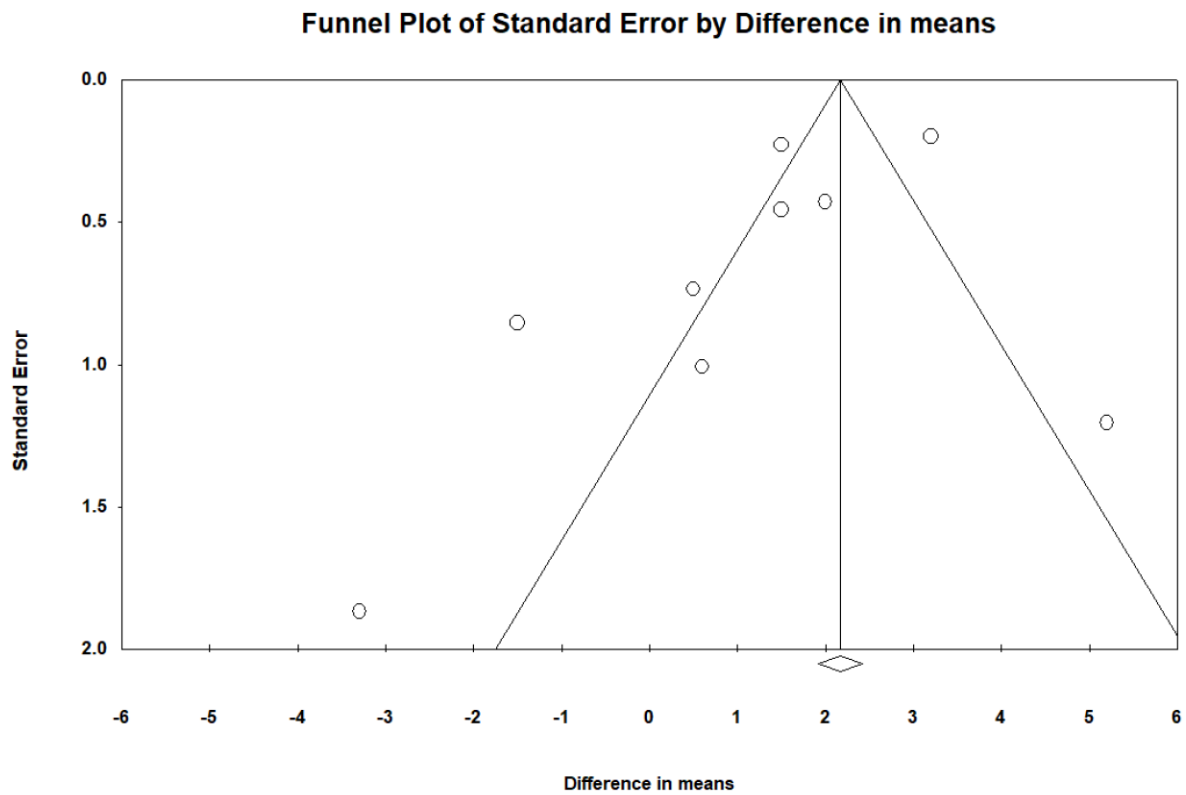

### Egger's regression intercept

|                            |          |
|----------------------------|----------|
| Intercept                  | -2.71649 |
| Standard error             | 1.65051  |
| 95% lower limit (2-tailed) | -6.61932 |
| 95% upper limit (2-tailed) | 1.18634  |
| t-value                    | 1.64585  |
| df                         | 7.00000  |
| P-value (1-tailed)         | 0.07189  |
| P-value (2-tailed)         | 0.14379  |



## Funnel plot and Egger's regression test for LLD

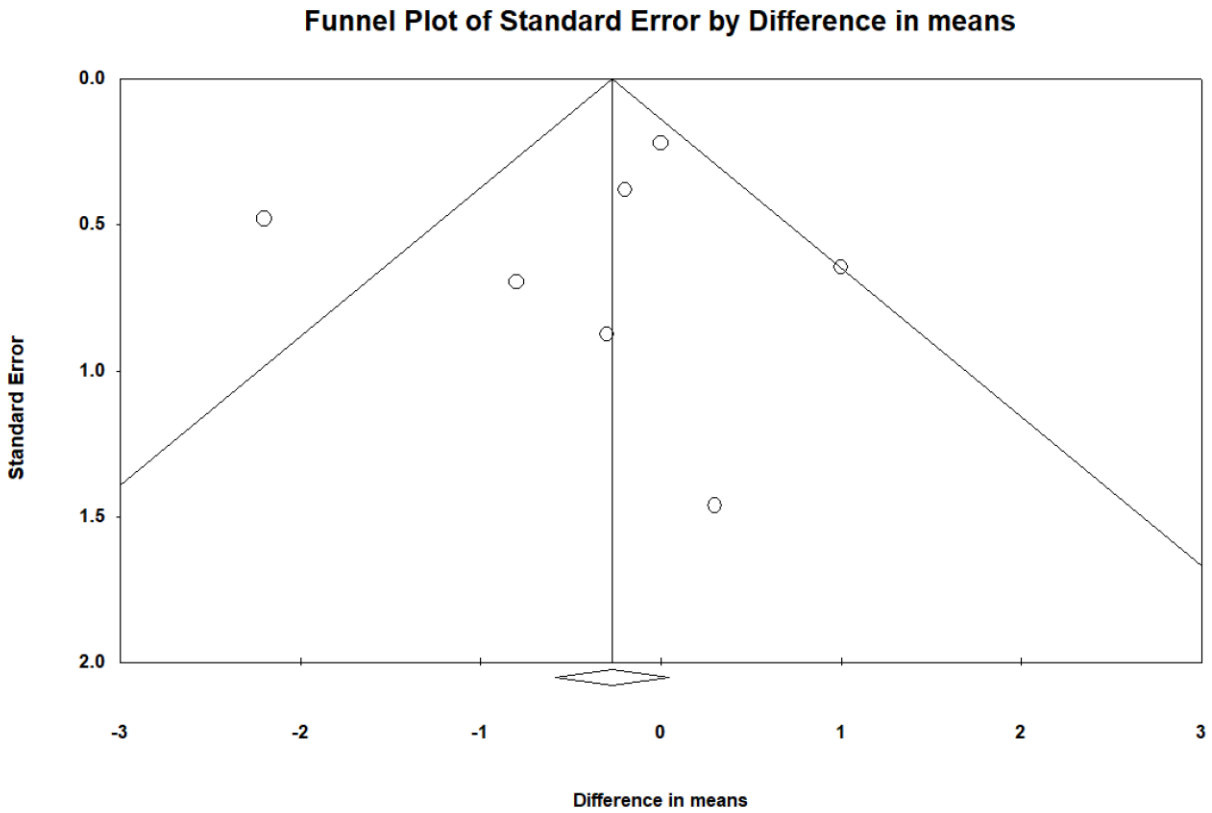

### Egger's regression intercept

|                            |          |
|----------------------------|----------|
| Intercept                  | -0.55765 |
| Standard error             | 1.54611  |
| 95% lower limit (2-tailed) | -4.53205 |
| 95% upper limit (2-tailed) | 3.41676  |
| t-value                    | 0.36068  |
| df                         | 5.00000  |
| P-value (1-tailed)         | 0.36654  |
| P-value (2-tailed)         | 0.73308  |
